# New and Essential Geriatric Psychiatry Titles

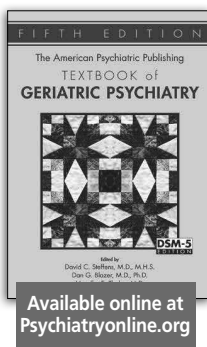

## The American Psychiatric Publishing Textbook of Geriatric Psychiatry, Fifth Edition

*Edited by David C. Steffens, M.D., M.H.S., Dan G. Blazer, M.D., Ph.D., and Mugdha E. Thakur, M.D.*

This Fifth Edition is an indispensable resource for psychiatric clinicians and trainees charged with assessing, diagnosing, and treating mental disorders. Building on the prodigious strengths of previous editions, this revision is the most current, comprehensive, and systematic textbook of geriatric psychiatry available today, and the only one that is DSM-5® concordant.

Widely recognized as the standard in its field, the book serves a critical need for clinicians challenged to meet the mental health needs of an aging population.

2015 • 837 pages • ISBN 978-1-58562-484-3 • Hardcover • \$192.00 • Item #62484

2015 • 837 pages • ISBN 978-1-58562-522-2 • eBook • \$154.00 • Item #62522

2015 • 12 Month Subscription • Online at Psychiatryonline.org • \$166.00 • Item #537005

**NEW!**

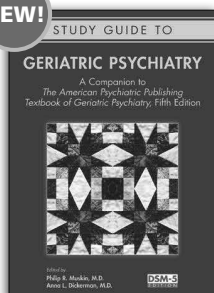

## Study Guide to Geriatric Psychiatry

*A Companion to The American Psychiatric Publishing Textbook of Geriatric Psychiatry, Fifth Edition*

*Philip R. Muskin, M.D., and Anna L. Dickerman, M.D.*

*Study Guide to Geriatric Psychiatry* is a question-and-answer companion that allows you to evaluate your mastery of the subject matter as you progress through *The American Psychiatric Publishing Textbook of Geriatric Psychiatry, Fifth Edition*. The *Study Guide* is made up of approximately 255 questions divided into 25 individual quizzes that correspond to chapters in the textbook. Questions are followed by an answer guide that references relevant text in the textbook. Each answer is accompanied by a discussion that addresses the correct response and also explains why other responses are not correct.

2017 • 352 pages • ISBN 978-1-61537-045-0 • Paperback • \$62.00 • Item #37045

2017 • 352 pages • ISBN 978-1-61537-106-8 • eBook • \$49.95 • Item #37106

**NEW!**

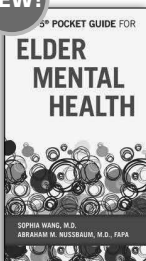

## DSM-5® Pocket Guide for Elder Mental Health

*Sophia Wang, M.D., and Abraham M. Nussbaum, M.D., FAPA*

The *DSM-5 Pocket Guide for Elder Mental Health* is an easily understandable tool for psychiatric and non-psychiatric professionals. It captures the essence of geriatric principles including care coordination, functional status, and the well-being of the caregiver as well as the patient in the context of well-crafted case scenarios. Drs. Wang and Nussbaum have truly operationalized the DSM-5 for geriatric providers and patients.

2017 • 375 pages • ISBN 978-1-61537-056-6 • Paperback • \$65.00 • Item #37056

2017 • 375 pages • ISBN 978-1-61537-119-8 • eBook • \$52.00 • Item #37119

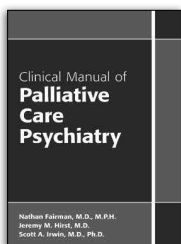

## Clinical Manual of Palliative Care Psychiatry

*Nathan Fairman, M.D., M.P.H., Jeremy M. Hirst, M.D., and Scott A. Irwin, M.D., Ph.D.*

The book seeks to bridge the gulf between principles and practice for two groups of clinicians: front-line palliative care providers with little mental health training and mental health specialists who may lack familiarity with palliative care practice. The book reviews palliative care principles and practice models, treatment of the psychiatric symptoms most commonly encountered in palliative care settings.

2016 • 297 pages • ISBN 978-1-58562-476-8 Paperback • \$61.00 • Item #62476

2016 • 297 pages • ISBN 978-1-61537-061-0 • eBook • \$48.95 • Item #37061

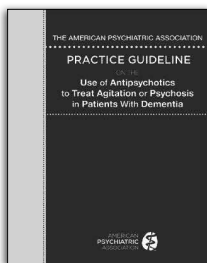

## The American Psychiatric Association Practice Guideline on the Use of Antipsychotics to Treat Agitation or Psychosis in Patients With Dementia

*American Psychiatric Association*

The guideline offers clear, concise, and actionable recommendation statements to help clinicians to incorporate recommendations into clinical practice, with the goal of improving quality of care. Each recommendation is given a rating that reflects the level of confidence that potential benefits of an intervention outweigh potential harms.

2016 • 218 pages • ISBN 978-0-89042-677-7 • Paperback • \$65.00 • Item #2677

2016 • 218 pages • ISBN 978-0-89042-678-4 • eBook • \$52.00 • Item #2678

# Searching for the perfect psychiatric career?

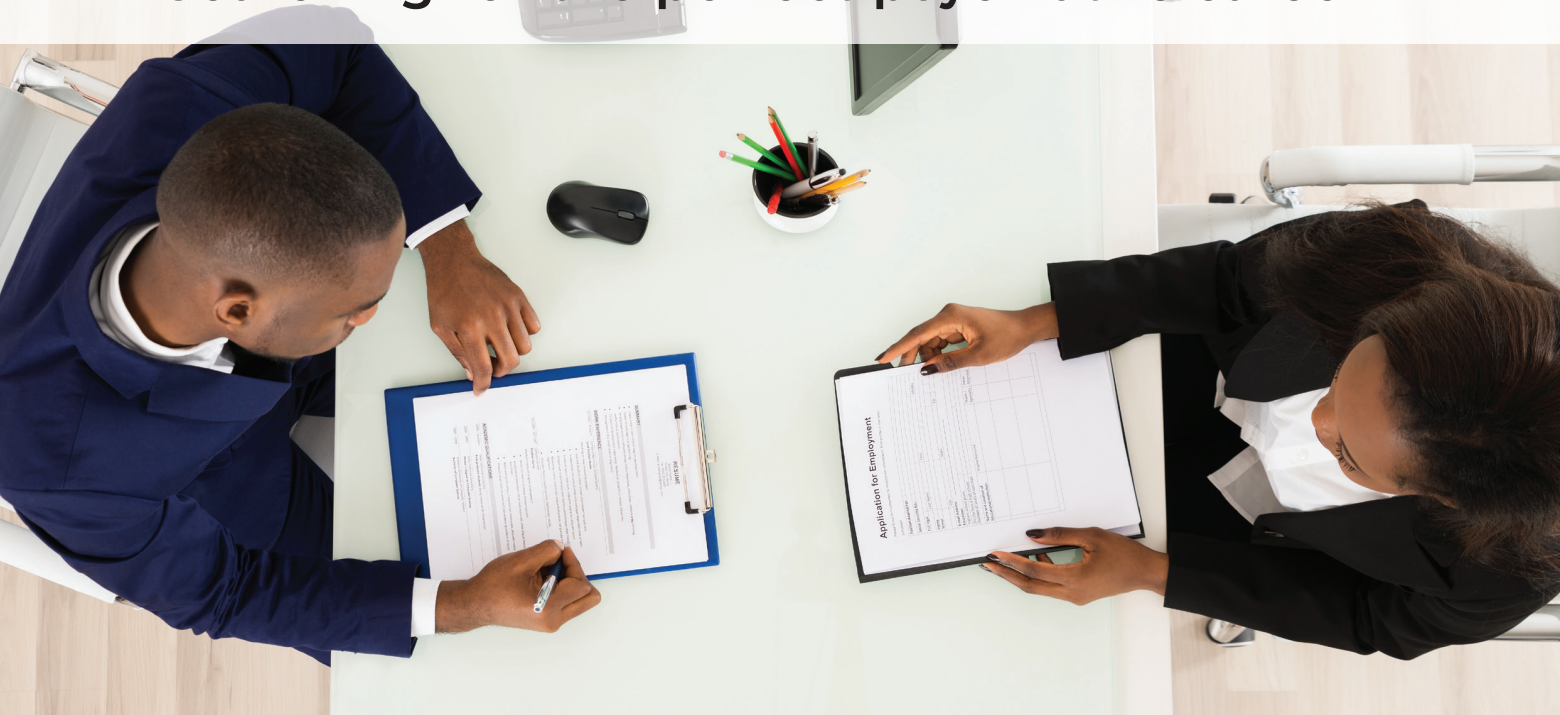

## Let APA JobCentral help!

### Manage Your Career

- Browse hundreds of active job listings!
- Create an account to save jobs, store multiple resumes and cover letters and communicate with employers through our internal messaging system.
- Set up multiple job alerts specifying your skills, interests and location to receive e-mails when employers post jobs that match your criteria.

### Recruit for Open Positions

- Post your job in front of thousands of highly qualified psychiatrists.
- Cross promote your job listing in Psychiatric News.
- Search the anonymous resume database to find your ideal candidate.

AMERICAN  
PSYCHIATRIC  
ASSOCIATION

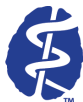

**JOBCENTRAL**  
The Career Hub for Psychiatry

[jobs.psychiatry.org](http://jobs.psychiatry.org)

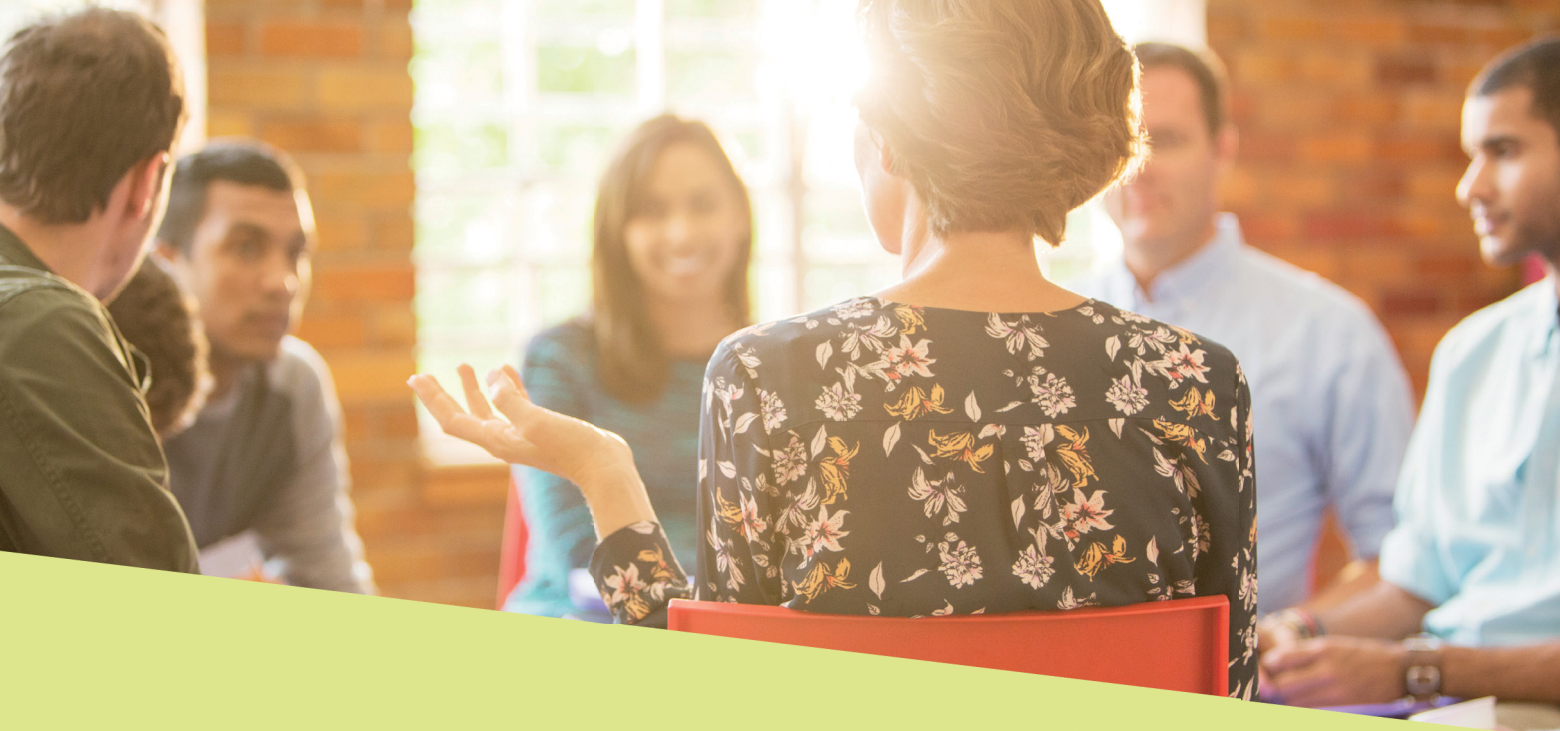

# Expand Your Opportunities And Grow Your Career

Join the largest, most dynamic mental health department in the nation and make a difference in the lives of those who need it the most.

- Multiple avenues for advancement and professional development
- Flexible work schedules, unparalleled work-life balance
- Highly competitive benefits
- Competitive starting annual salary with potential bonuses of up to **\$32,000 annually**
- Student loan repayment incentive of up to **\$250,000**
- Reimbursement for eligible relocation expense of up to **\$15,000**

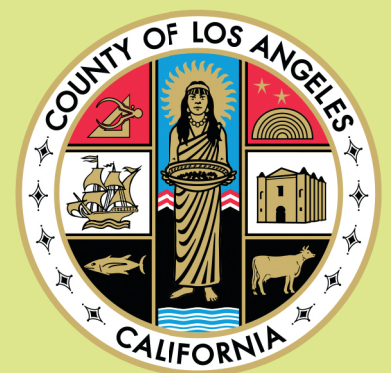

**LOS ANGELES COUNTY  
DEPARTMENT  
OF MENTAL HEALTH**

HOPE • RECOVERY • WELLBEING

[www.psychiatristjobs.la](http://www.psychiatristjobs.la)
