# Psychiatric Services

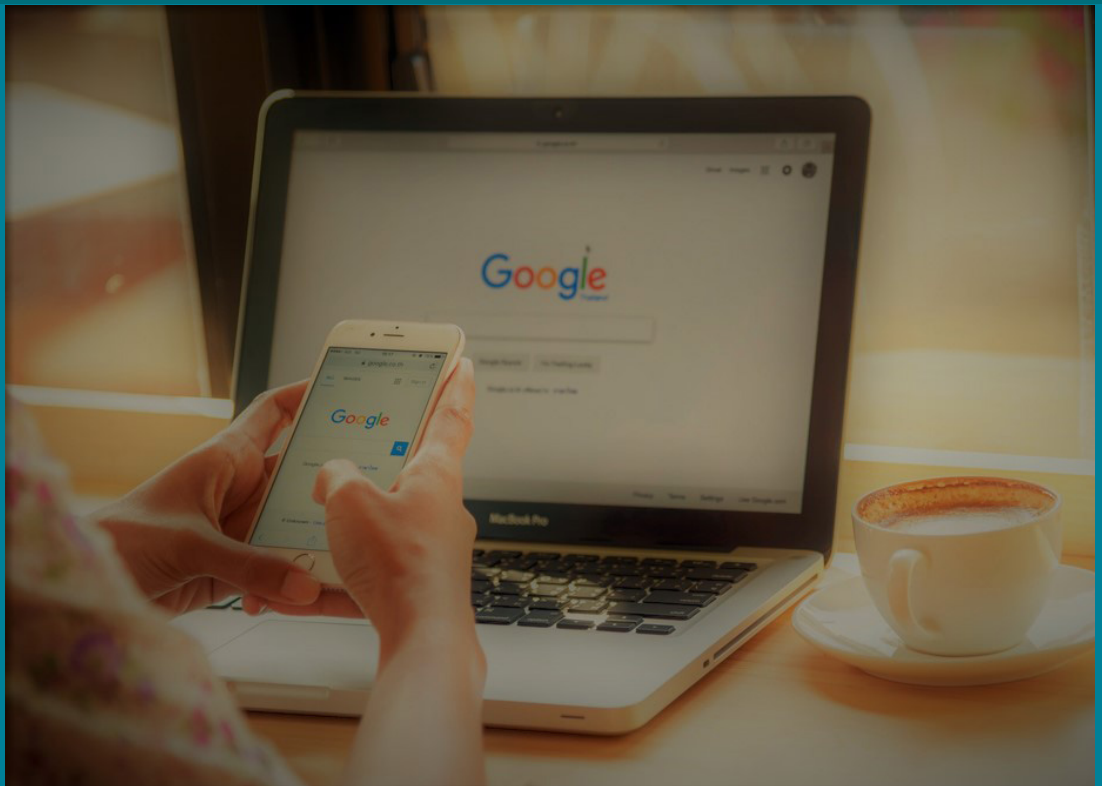

Ethical considerations: Internet searches for patient information

Use of medication versus psychotherapy for major depressive disorder

Distribution and correlates of assertive community treatment: N-MHSS results

Integrating peer support specialists into research studies
